# Supplementary material
Source: Springer Nature journal article supplement (https://www.springermedizin.de/resource/supplementary/12936_2012_2533_MOESM11_ESM.pdf/9543200)
Supplement: MOESM11 [file 9543200]

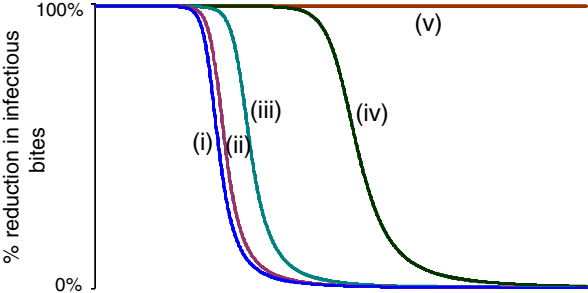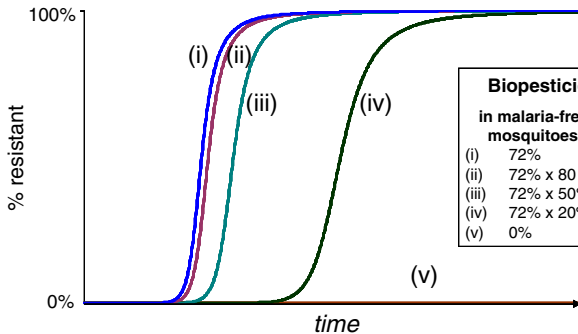

| Biopesticide mortality rate |                            |                          |
|-----------------------------|----------------------------|--------------------------|
|                             | in malaria-free mosquitoes | in malaria-infected mos. |
| (i)                         | 72%                        | 72%                      |
| (ii)                        | 72% x 80                   | 72%                      |
| (iii)                       | 72% x 50%                  | 72%                      |
| (iv)                        | 72% x 20%                  | 72%                      |
| (v)                         | 0%                         | 72%                      |
